# Supplementary material for: Amelioration of arthritis through mobilization of peptide-specific CD8+ regulatory T cells
Source: JCI journal article supplement (doi:10.1172/jci66938), 2013-02-08
Supplement: sd1 [file 1]

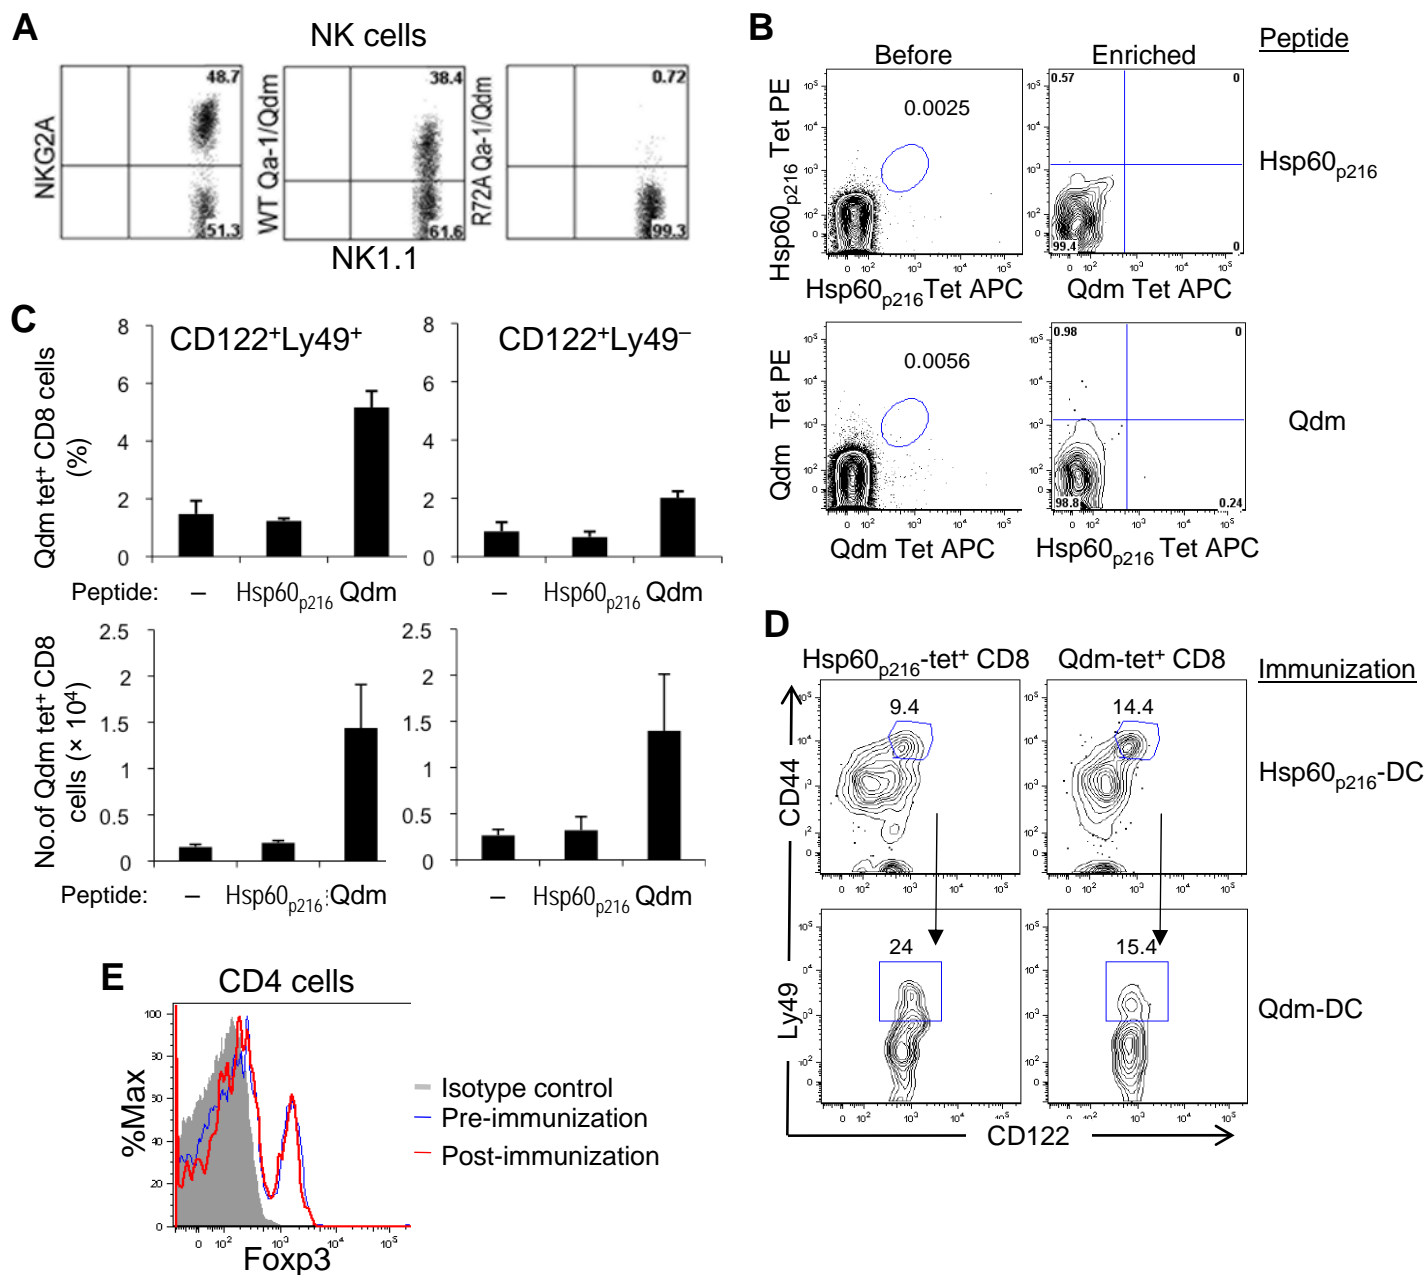

**Figure S1. Selective expansion of Qa-1-restricted CD8 Treg.**

**A**, WT.Qa-1–Qdm but not R72A.Qa-1–Qdm tetramers bind to CD94/NKG2A receptors on NK1.1<sup>+</sup>TCR $\beta$ <sup>-</sup> NK cells. **B**, Flow cytometry of draining lymph node cells from CII-immune OT-1 transgenic mice injected with DC-pulsed peptides as in Fig. 1A, stained with Qa-1-tetramers labeled with phycoerythrin (Tet-PE) or allophycocyanin (Tet-APC) and analyzed before and after (Enriched) magnetic enrichment for tet<sup>+</sup> CD8 cells. **C**, Percentages and numbers of Qdm-tet<sup>+</sup> CD8 cells as assessed in Figure 1C in CD122<sup>+</sup>Ly49<sup>+</sup> and CD122<sup>+</sup>Ly49<sup>-</sup> subsets are shown. **D**, Representative FACS plots of CD122, CD44 and Ly49 expression in Qa-1-tetramer<sup>+</sup> CD8 cells after immunization with indicated peptide-loaded DC. **E**, Histogram overlay of Foxp3 expression in CD4 cells before and after Hsp60<sub>p216</sub> immunization as in Figure. 1C.

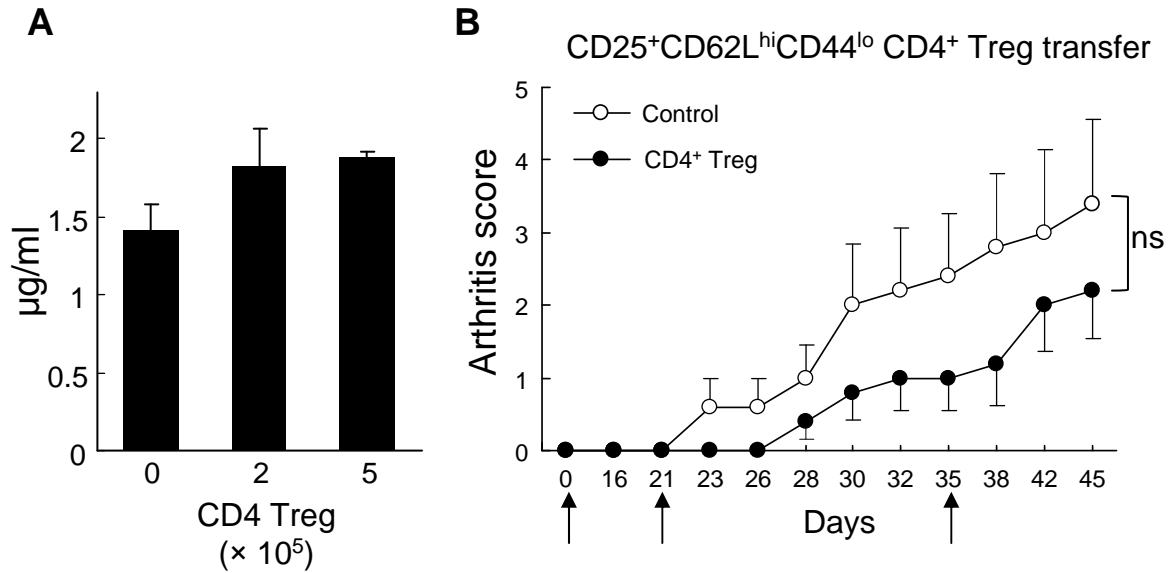

**Figure S2. Fc $\gamma$ R3<sup>+</sup> CD4<sup>+</sup> Treg do not efficiently inhibit anti-collagen response or disease progression.**

**A**, Purified CD25<sup>-</sup> CD4 cells and B cells from arthritic mice were co-transferred into *Rag2*<sup>-/-</sup>*Prf1*<sup>-/-</sup> mice with or without the indicated numbers of sorted CD25<sup>+</sup> CD62L<sup>hi</sup> CD44<sup>lo</sup> CD4<sup>+</sup> Treg cells from arthritic mice. Mice were immunized at d0 and boosted at d21 (black arrows). Serum titers of anti-mouse CII IgG were measured at d38.

**B**, Arthritis scores are shown for 5 mice/group.

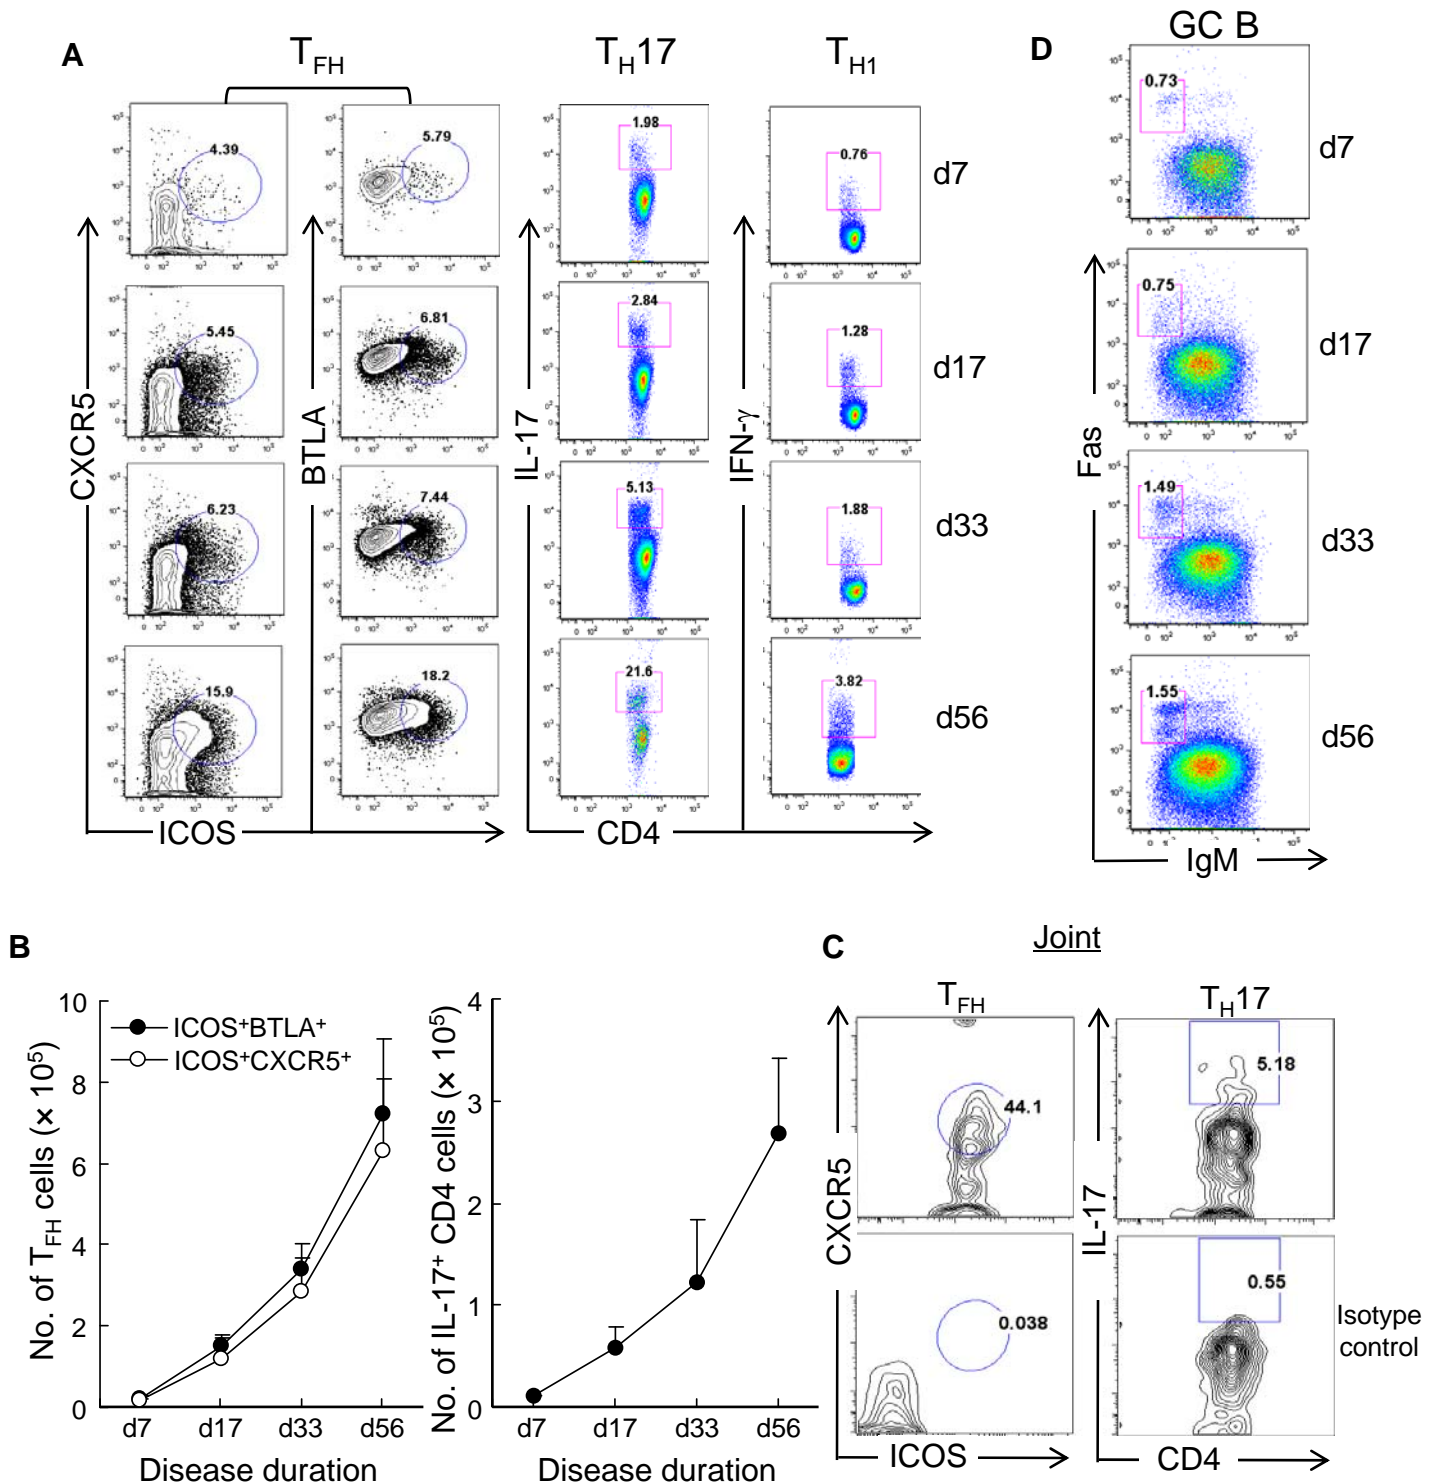

**Figure S3. Kinetic expansion of cell populations in CIA.**

CIA was induced in B6.WT mice as described in Methods. **A**, (*left*) Representative profiles of T<sub>FH</sub> cells (ICOS<sup>+</sup>CXCR5<sup>+</sup> or ICOS<sup>+</sup>BTLA<sup>+</sup>) in non-draining lymph nodes (non-dLN) at the indicated days are shown. (*Right*) Representative plots of intracellular IL-17 and IFN<sub>γ</sub> in CD4 cells from non-dLN at indicated days. **B**, The numbers of T<sub>FH</sub> cells (ICOS<sup>+</sup> CXCR5<sup>+</sup> or ICOS<sup>+</sup> BTLA<sup>+</sup> CD4 cells) or IL-17<sup>+</sup> CD4 cells (*right*) from non-draining lymph nodes (non-dLN) were analyzed at the indicated days. Three mice per time point were tested. **C**, Representative plots show ICOS<sup>+</sup>CXCR5<sup>+</sup> T<sub>FH</sub> and intracellular IL-17 expression in CD45<sup>+</sup> CD4<sup>+</sup> cells isolated from inflamed joints at d35. **D**, Representative plots of germinal center B cells (IgM<sup>+</sup>Fas<sup>+</sup>B220<sup>+</sup>) during CIA development are shown.

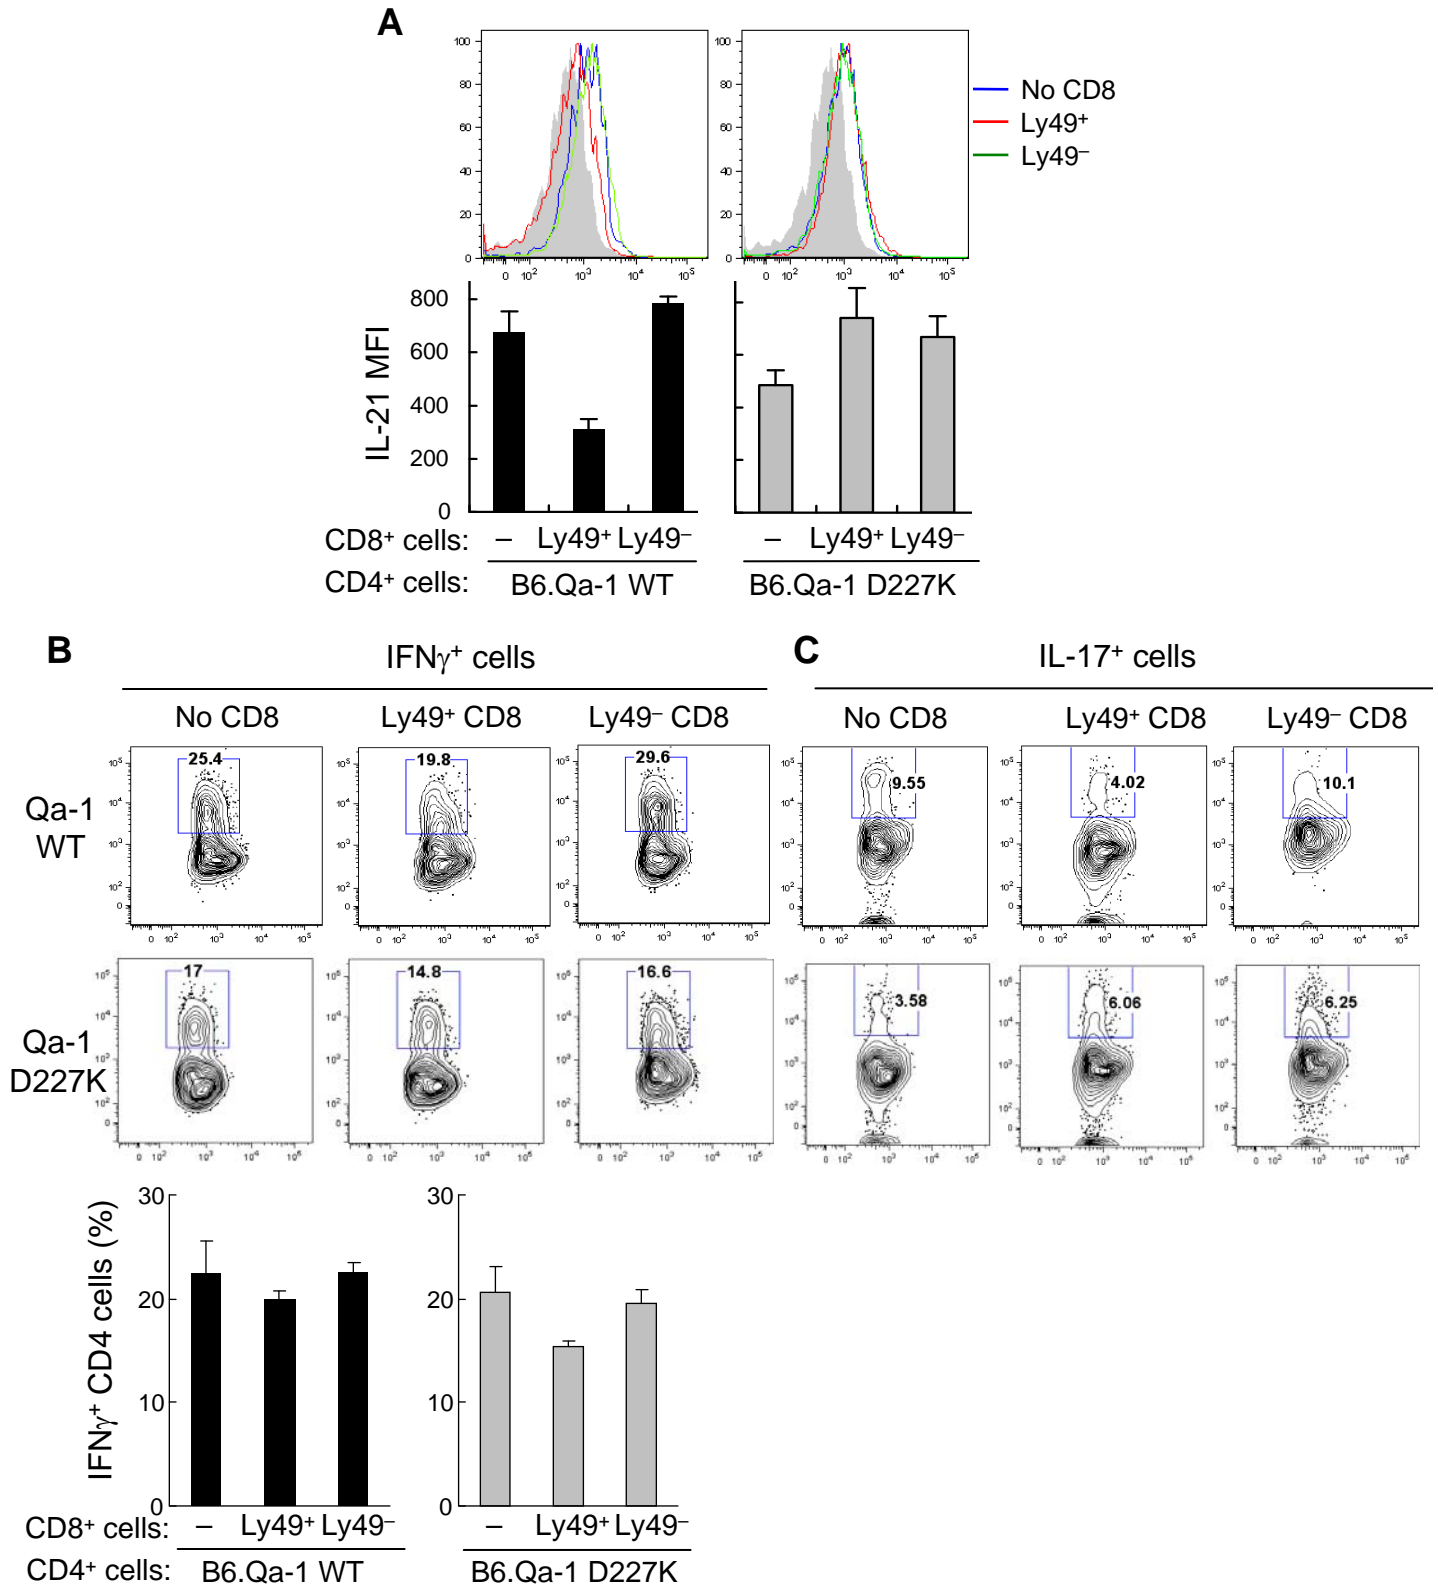

**Figure S4. CD8<sup>+</sup> Treg inhibit expansion of IL-21<sup>+</sup> and IL-17<sup>+</sup> CD4<sup>+</sup> cells but do not affect expansion of IFN $\gamma$ <sup>+</sup> CD4<sup>+</sup> cells in CIA.**

Adoptive transfer, arthritis induction and analysis of splenic cellular profiles were performed as in Figure 2. Histogram overlays of intracellular IL-21 in CD4 cells (A, Upper) and bar graphs of IL-21 MFI (A, Lower) are shown. Representative plots of IFN $\gamma$  expression in CD4 cells (B, Upper) and bar graphs of percentages of IFN $\gamma$ <sup>+</sup> CD4 cells (B, Lower) are shown. C, Representative plots of IL-17 expression in CD4 cells are shown.

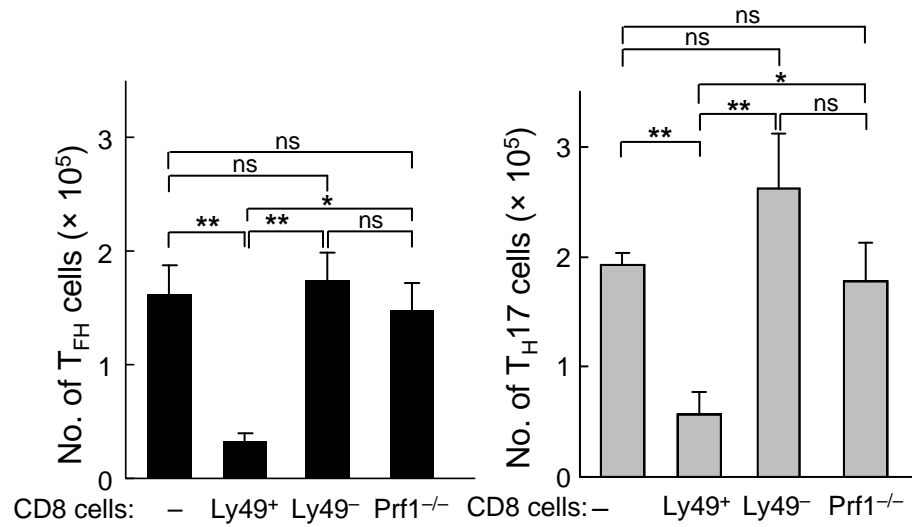

**Figure S5. CD8<sup>+</sup> Treg activity depends on perforin expression.**

Adoptive transfer of CD4 cells and B cells with  $1.5 \times 10^5$  CD122<sup>+</sup>CD44<sup>hi</sup>Ly49<sup>+</sup> or CD122<sup>+</sup>CD44<sup>hi</sup>Ly49<sup>-</sup> CD8 cells or CD8 cells from CII-immunized *Prf1*<sup>-/-</sup> mice as described as in Figure 2A. Numbers of splenic T<sub>FH</sub> cells (*left panel*) and IL-17<sup>+</sup> CD4<sup>+</sup> (T<sub>H</sub>17) cells (*right panel*) are shown. *P* values: \* = <0.05, \*\* = <0.01, \*\*\* = <0.001; n.s., no significance.

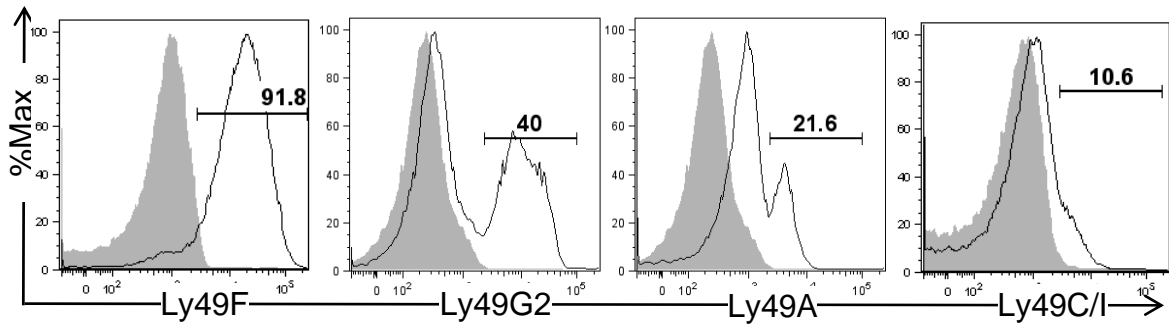

**Figure S6. The stability of Ly49<sup>+</sup> CD8<sup>+</sup> Treg after *in vitro* IL-15C culture.**

Sorted CD122<sup>+</sup>Ly49<sup>+</sup> CD8<sup>+</sup> Treg cells were incubated *in vitro* with 10 ng ml<sup>-1</sup> IL-15C × 1 wk. Histogram overlays of expression of Ly49F, G2, A and C/I are shown. Gray: isotype controls.

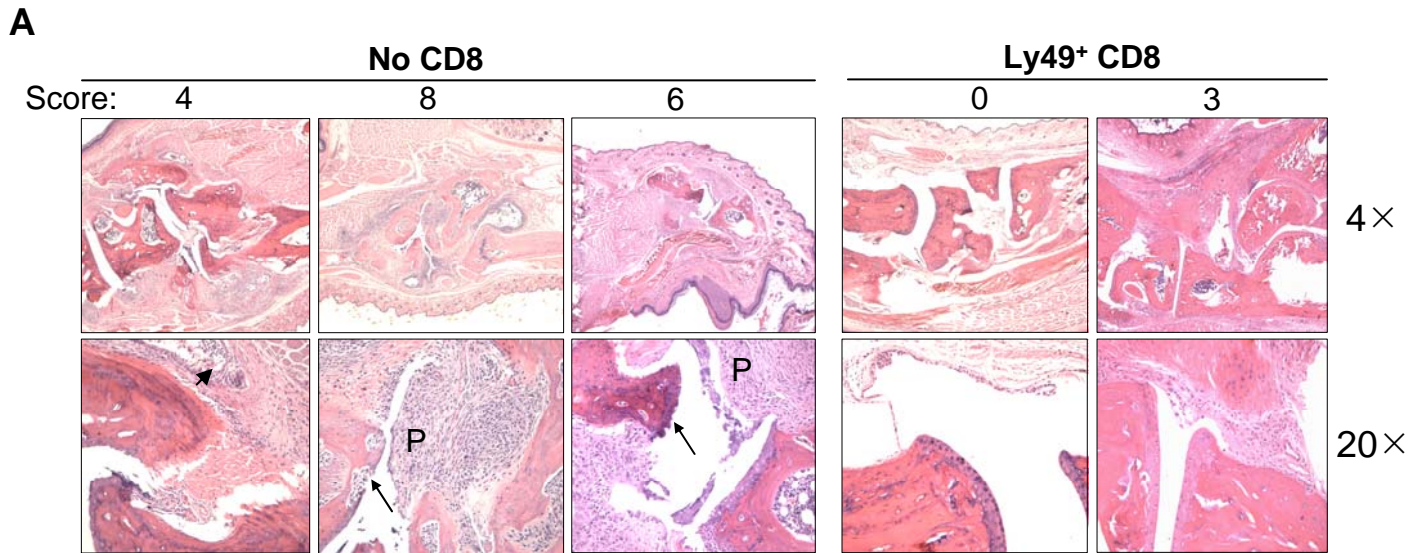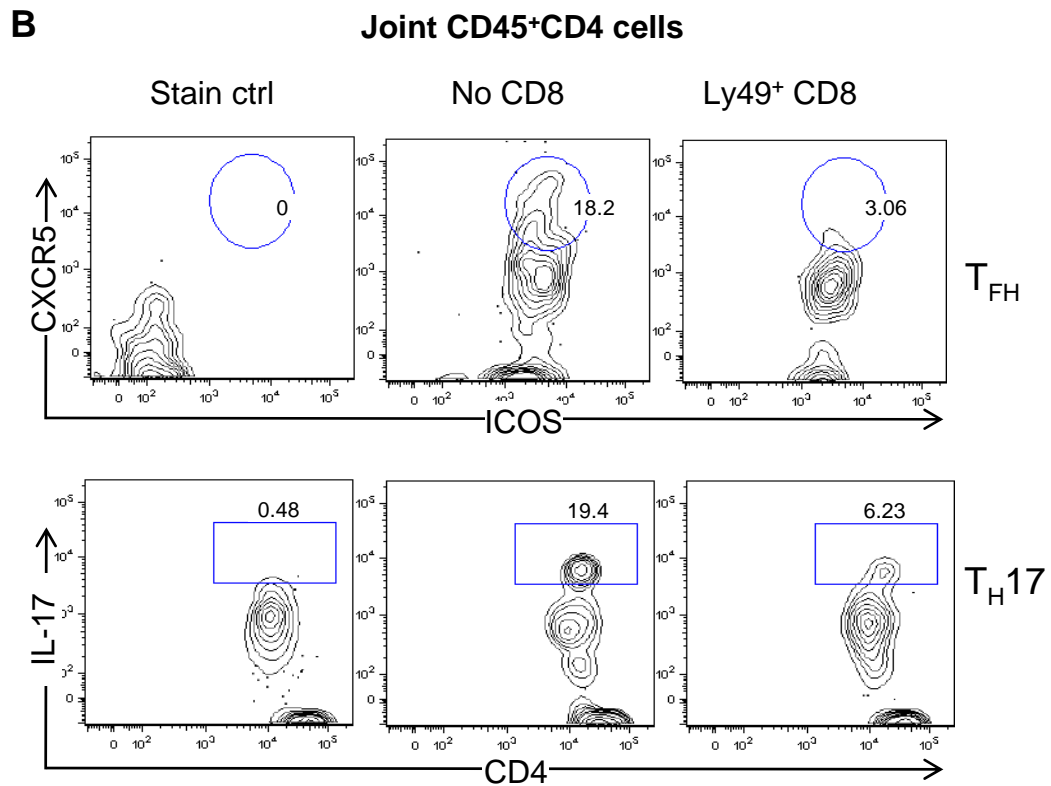

**Figure S7. Transfer of Ly49<sup>+</sup> CD8<sup>+</sup> Treg inhibits arthritis in B6 mice.**

CIA was induced in B6.WT mice as described in Methods. In vitro-expanded CD122<sup>+</sup>CD44<sup>hi</sup>Ly49<sup>+</sup> CD8<sup>+</sup> cells were transferred into B6 mice as described in Figure 4C. **A**, Representative histology images of hematoxylin and eosin-stained joints along with the arthritis score are shown at a magnification of 4× and 20×. Transfer of Ly49<sup>+</sup> CD8 cells results in diminished inflammatory cells infiltration, pannus formation and bone destruction. P: pannus formation; arrow: cartilage erosion; arrowhead: leukocyte infiltration. **B**, Representative plots show ICOS<sup>+</sup>CXCR5<sup>+</sup>  $T_{FH}$  and intracellular IL-17 expression in CD45<sup>+</sup> CD4<sup>+</sup> cells isolated from inflamed joints at d50.

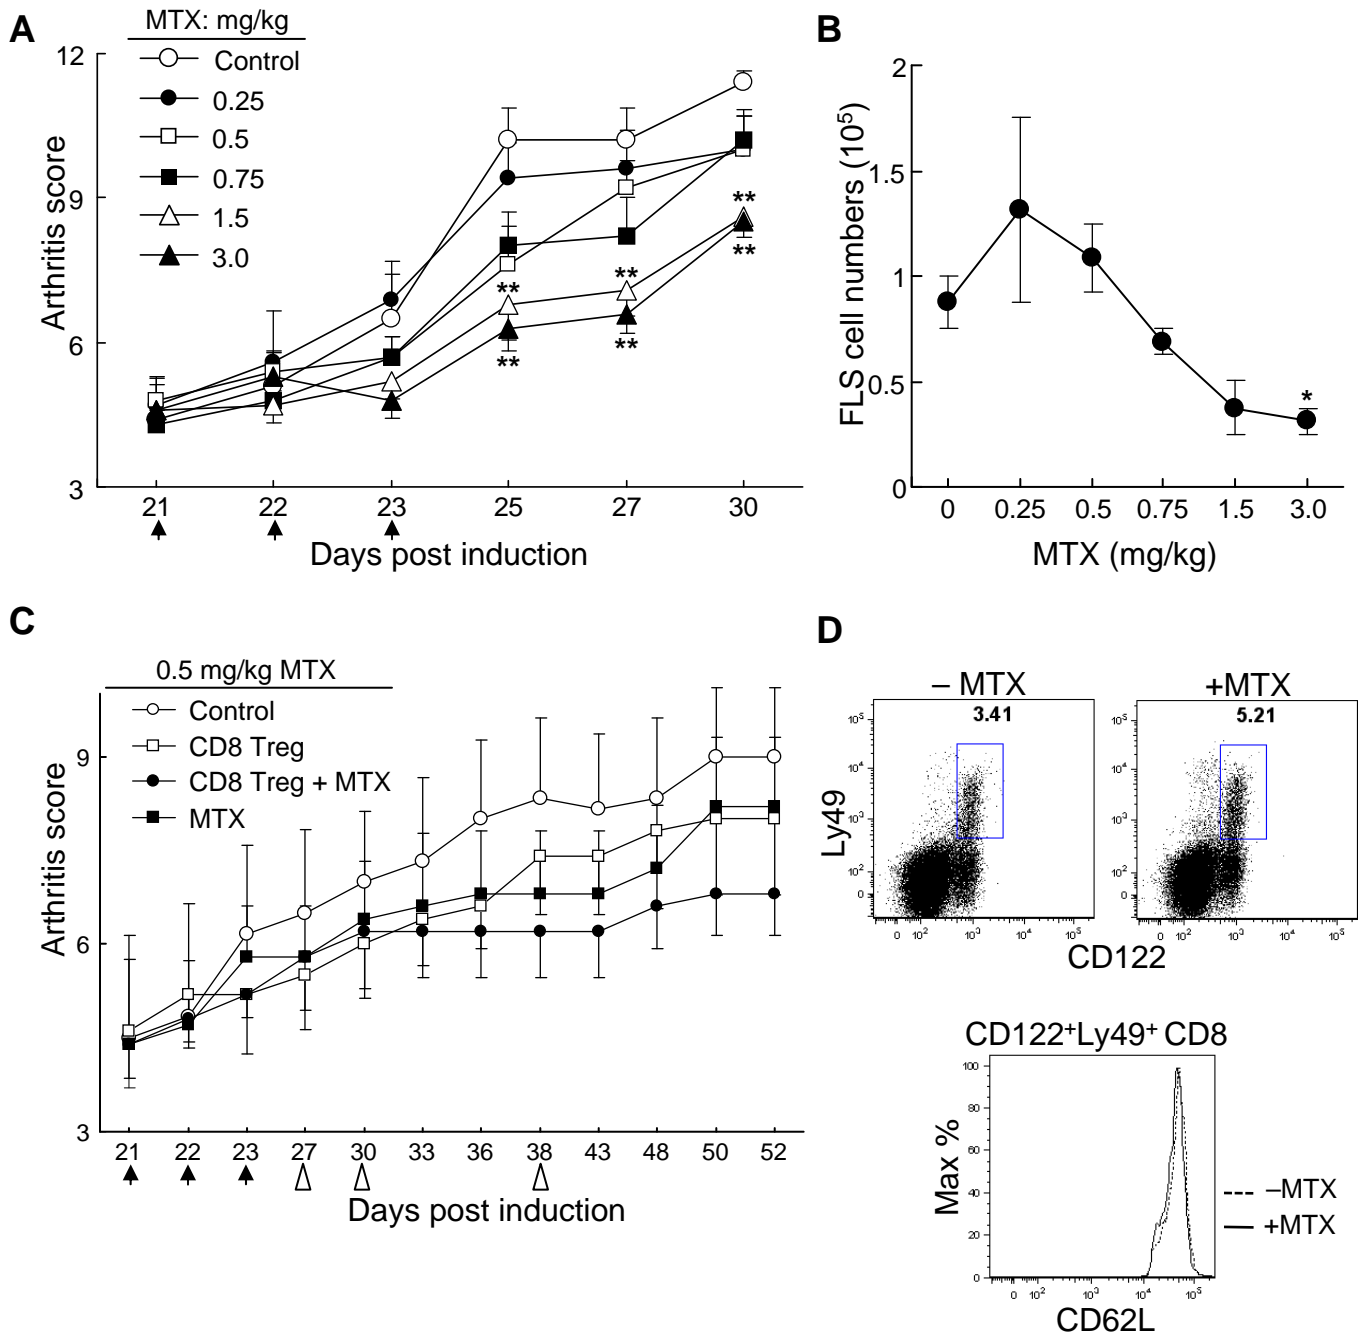

**Figure S8. Dose response of methotrexate (MTX) injection on arthritis progression.**

**A**, B6 mice that developed arthritis with an average score of 4.5 were given different concentrations of MTX from d21 to d23 (arrowheads). Arthritis scores are plotted. 5 mice/group were used.  $**P < 0.01$ , group (control) versus groups (1.5 mg/kg and 3 mg/kg). **B**, Synovial tissue cells from each mouse in (A) were isolated and cultured as described. Adherent cells were passaged three times and contained mainly fibroblast-like synoviocytes (FLS). The numbers of FLS are plotted over the indicated MTX concentrations ( $n=2$ ).  $*P < 0.05$ , group (control) versus group (3 mg/kg). **C**, 0.5 mg/kg MTX was injected into B6 mice from d21 to d23 (arrowheads) that developed arthritis with an average score of 4.5. In vitro IL-15C-expanded CD122<sup>+</sup>CD44<sup>hi</sup>Ly49<sup>+</sup> CD8<sup>+</sup> cells ( $2.5 \times 10^5$ ) were transferred into mice at d27, d30 and d38 ( $\Delta$ ). Arthritis scores are plotted. 5-8 mice/group were used. **D**, (upper panel) Representative profiles of CD122<sup>+</sup>Ly49<sup>+</sup> CD8<sup>+</sup> Treg from non-dLN at d25 are shown. (Lower panel) A histogram overlay of CD62L expression of CD122<sup>+</sup>Ly49<sup>+</sup> CD8<sup>+</sup> Treg is shown comparing groups with or without MTX treatment.



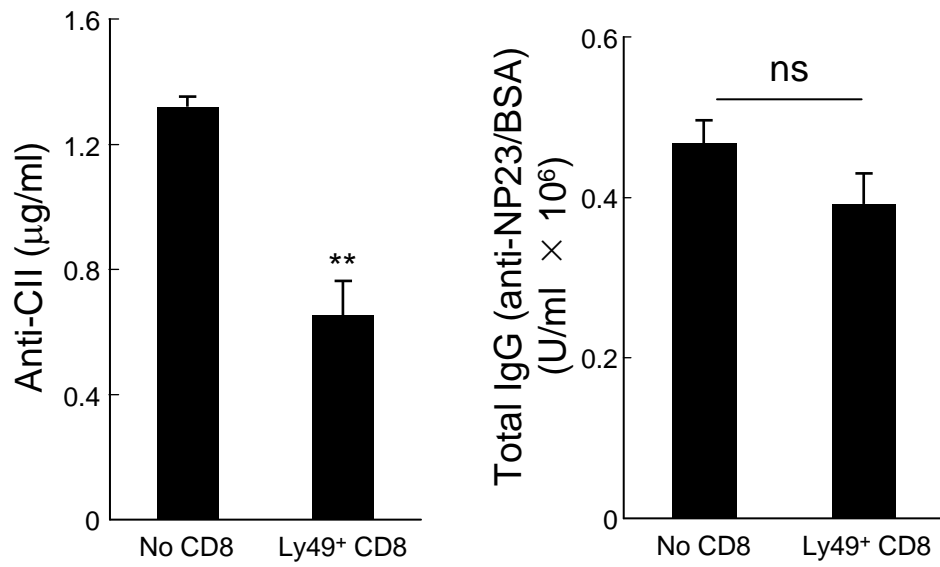

**Figure S9. Transfer of Ly49<sup>+</sup> CD8 cells did not significantly affect the anti-NP response of adoptive hosts.** Adoptive transfer of CD4 cells and B cells with or without CD122<sup>+</sup>CD44<sup>hi</sup>Ly49<sup>+</sup> CD8 cells into *Rag2*<sup>-/-</sup>*Prf1*<sup>-/-</sup> hosts as described as in Figure 2A. At d50, mice were intraperitoneally immunized with 100 µg NP<sub>19</sub>-KLH in CFA. Serum anti-CII autoantibody and anti-NP<sub>23</sub> total IgG titers were analyzed at d12 after immunization. *P* values: \*\* = <0.01, n.s., no significance. 4 mice/group were used.
